# Supplementary material for: CareerMap: visualizing career trajectory
Source: Springer Nature journal article supplement (doi:10.1007/s11432-018-9469-5), 2018-08-31
Supplement: 11432_2018_9469_MOESM1_ESM.pdf [file 11432_2018_9469_MOESM1_ESM.pdf]

# CareerMap: Visualizing Career Trajectory

Kan Wu, Jie Tang, Zhou Shao, Xinyi Xu, Bo Gao & Shu Zhao

Dept. Of Computer Science, Tsinghua University

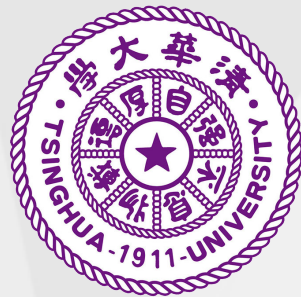

# Challenges

## Challenge 1:

Name ambiguity

solution

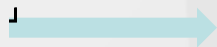

Unified Probabilistic Models [1]

## Challenge 2:

Data incompleteness

solution

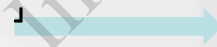

Spatial-Temporal Factor Graph Model (STFGM)

## Challenge 3:

Visualize many scholars' merged trajectories on the map, e.g. 100 people move from Boston to New York

solution

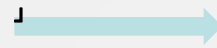

Hotspot detection algorithm

# Architecture

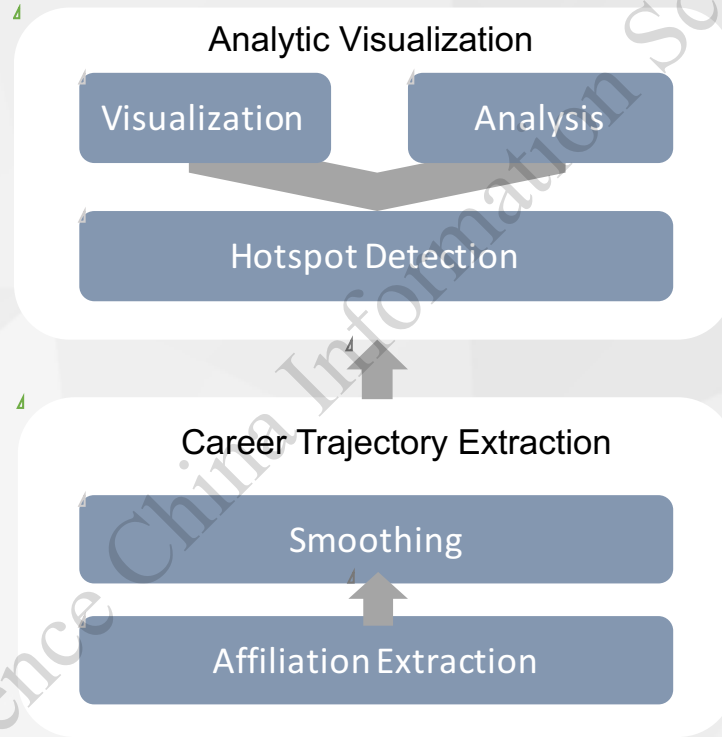

# Spatial-Temporal Factor Graph Model (continued)

## • The general idea

- try to find the affiliation-known coauthor who has the same affiliation as the target author with missing affiliation.

Each green point with common  $t$  outside, representing a tuple of  $\langle \text{Time } t, \text{ Author } a_{i1}, \text{ Author } a_{i2} \rangle$ , is an observation instance where  $a_{i1}$  is the target author and  $a_{i2}$  is a coauthor with known affiliation at  $t$ . Associated with each observation instance is a hidden binary-valued variable representing the affiliation similarity between the two authors. If they belong to the same affiliation at that time, the hidden value is 1, otherwise 0.

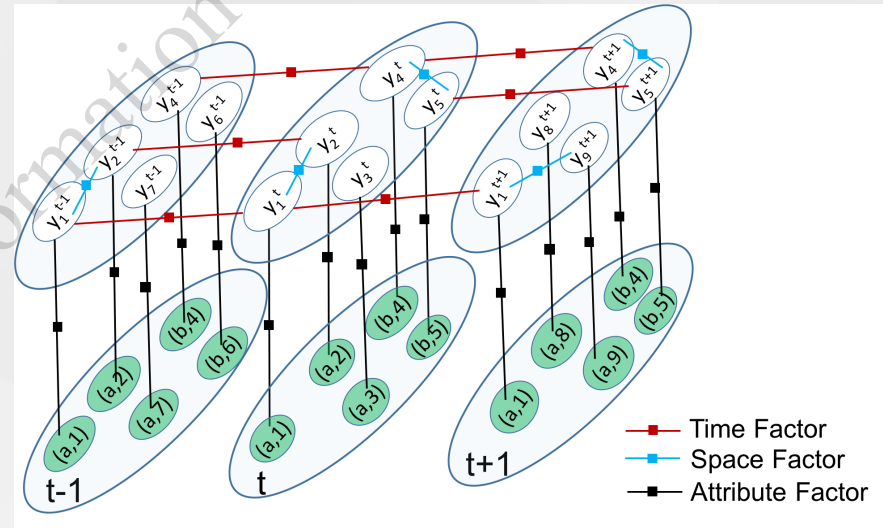

# Spatial-Temporal Factor Graph Model (continued)

## • Attribute factor

- captures the features of each tuple  
<Time  $t$ , Author  $a_{i1}$ , Author  $a_{i2}$ >

$$f(\mathbf{x}_i^t, \mathbf{y}_i^t) \triangleq \frac{1}{Z_\omega} \exp \{ \omega^T \Phi(\mathbf{x}_i^t, \mathbf{y}_i^t) \} \quad (1)$$

## • Space factor

- captures the correlation between the hidden variables in the same time
- $\mathcal{N}_S$  denotes all the space relations

$$\mathcal{S}(y_i^t, \mathcal{N}_S(y_i^t)) \triangleq \frac{1}{Z_\beta} \exp \left\{ \sum_{y_j^t \in \mathcal{N}_S(y_i^t)} \beta^T \Psi(y_i^t, y_j^t) \right\} \quad (2)$$

## • Time factor

- captures the correlation between the hidden variables in the same time
- $\mathcal{N}_T$  denotes all the time relations

$$\mathcal{T}(y_i^t, \mathcal{N}_T(y_i^t)) \triangleq \frac{1}{Z_\gamma} \exp \left\{ \sum_{y_i^{t'} \in \mathcal{N}_T(y_i^t)} \gamma^T \Omega(y_i^t, y_i^{t'}) \right\} \quad (3)$$

# Spatial-Temporal Factor Graph Model

## • Model Learning

- Maximize the likelihood of the observed data
- $\theta \triangleq (\omega^T, \beta^T, \gamma^T)^T$  is the parameters to be learned of the model

$$\begin{aligned} P(Y|X, \theta) &= \prod_t \prod_i f(\mathbf{x}_i^t, y_i^t) \mathcal{S}(y_i^t, \mathcal{N}_S(y_i^t)) \mathcal{T}(y_i^t, \mathcal{N}_T(y_i^t)) \\ &= \frac{1}{Z_\omega Z_\beta Z_\gamma} \exp \left\{ (\omega^T, \beta^T, \gamma^T) \sum_t \sum_i g(y_i^t) \right\} \\ &= \frac{1}{Z_\theta} \exp \left\{ \theta^T \mathcal{G}(Y) \right\} \end{aligned} \tag{4}$$

$$\theta^* = \arg \max_{\theta} \mathcal{O}(\theta) = \arg \max_{\theta} \log P(Y^L | X, \theta) \tag{5}$$

# Smoothing

- The general idea

- Use weight to reflect confidence of an affiliation at a time.
- Leverage the number of papers with the affiliation at time  $t$  as the weight.
- Denoting the weights at  $t_1$  and  $t_2$  are  $w_1$  and  $w_2$  respectively, the weight center  $t_c$  can be computed from:

$$\frac{t_c - t_1}{t_2 - t_c} = \frac{w_1}{w_2}$$

- If information between  $t_1$  and  $t_2$  is missing,
- $\forall t (t_1 < t < t_c)$ , Affiliation( $a, t$ ) = Affiliation( $a, t_1$ )
- $\forall t (t_c < t < t_2)$ , Affiliation( $a, t$ ) = Affiliation( $a, t_2$ )

# Example of scholar career trajectory extraction

## Scholar Career Trajectory

name:

affiliation:

[Aminer Search](#)

[Heatmap](#)

- 2015 - 2015 : w3c and mit boston ma usa
- 2013 - 2014 : computer science and ai laboratory massachusetts institute of technology vassar street cambridge ma 02139 usa
- 2012 - 2012 : university of southampton
- 2007 - 2011 : w3c and mit boston ma usa
- 2005 - 2006 : computer science and ai laboratory massachusetts institute of technology vassar street cambridge ma 02139 usa
- 2002 - 2004 : w3c and mit boston ma usa
- 1997 - 2001 : massachusetts institute of technology's laboratory
- 1994 - 1996 : cern geneva switzerland
- 1992 - 1993 : cern
- 1990 - 1991 : w3c and mit boston ma usa
- 1988 - 1989 : cern geneva switzerland

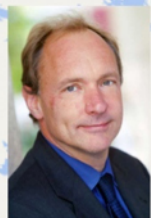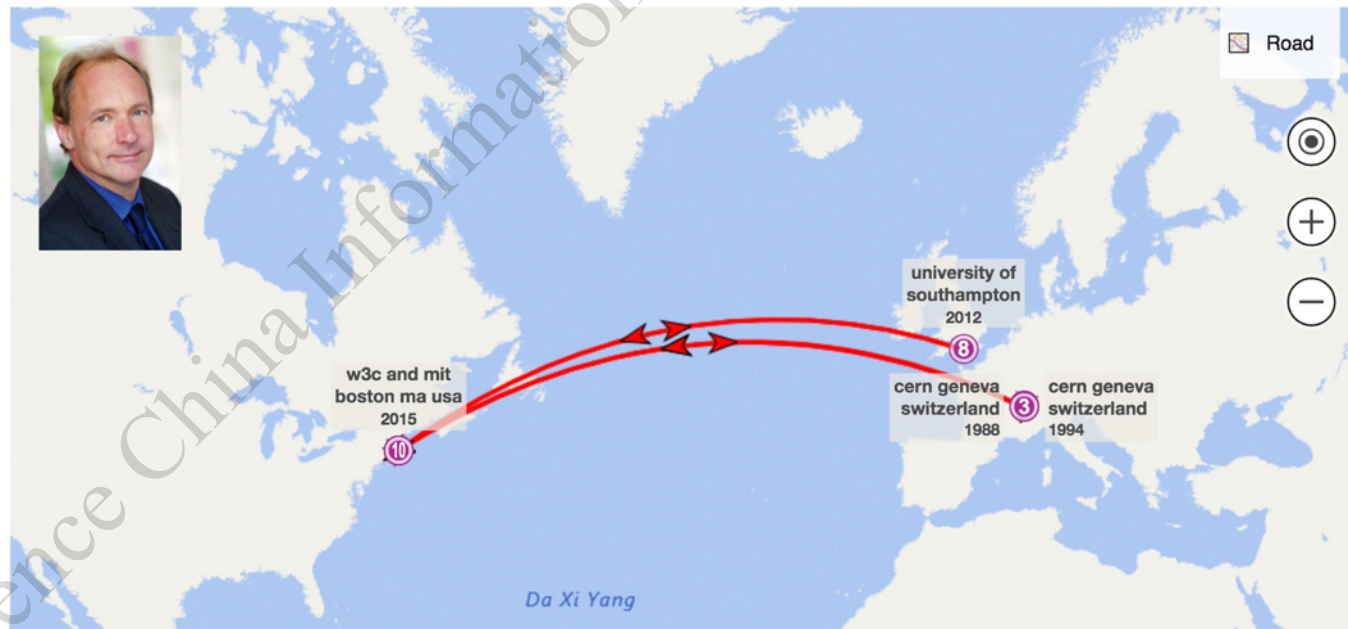



# Hotspot detection algorithm

- The general idea

- The heat centers have more neighbors than surrounding points.
- The heat centers "absorb" their surrounding points as their neighbors. If a point is "absorbed" by a heat center, then its neighbors are emptied.
- Finally, the points left out with nonempty neighbors are heat centers.

---

**Algorithm 1** Hotspot detection

---

**Input** : set of points  $\{v_1, v_2, \dots, v_N\}$ , radius of heatCenters  $R$

**Output**: heatCenters and points in them

**for**  $i \leftarrow 1$  to  $N$  **do**

  | neighbors( $v_i$ )  $\leftarrow \{v_i\}$

**end**

**for**  $i \leftarrow 1$  to  $N - 1$  **do**

  | **for**  $j \leftarrow i + 1$  to  $N$  **do**

    | **if** distance( $v_i, v_j$ )  $< 2R$  **then**

      | neighbors( $v_i$ )  $\leftarrow$  neighbors( $v_i$ )  $\cup \{v_j\}$

      | neighbors( $v_j$ )  $\leftarrow$  neighbors( $v_j$ )  $\cup \{v_i\}$

    | **end**

  | **end**

**end**

$\{v'_1, v'_2, \dots, v'_N\} \leftarrow$  sort  $\{v_1, v_2, \dots, v_N\}$  according to neighbor size in desc order

**for**  $i \leftarrow 1$  to  $N - 1$  **do**

  | **for**  $v_j \in$  neighbors( $v'_i$ ) **do**

    | neighbors( $v_j$ )  $\leftarrow \emptyset$

  | **end**

**end**

**for**  $i \leftarrow 1$  to  $N$  **do**

  | **if** neighbors( $v'_i$ )  $\neq \emptyset$  **then**

    | heatCenters( $v'_i$ ) = neighbors( $v'_i$ )

  | **end**

**end**

---

# Trajectory map generated by Career Map

## Scholars' Trajectories and Heat Map

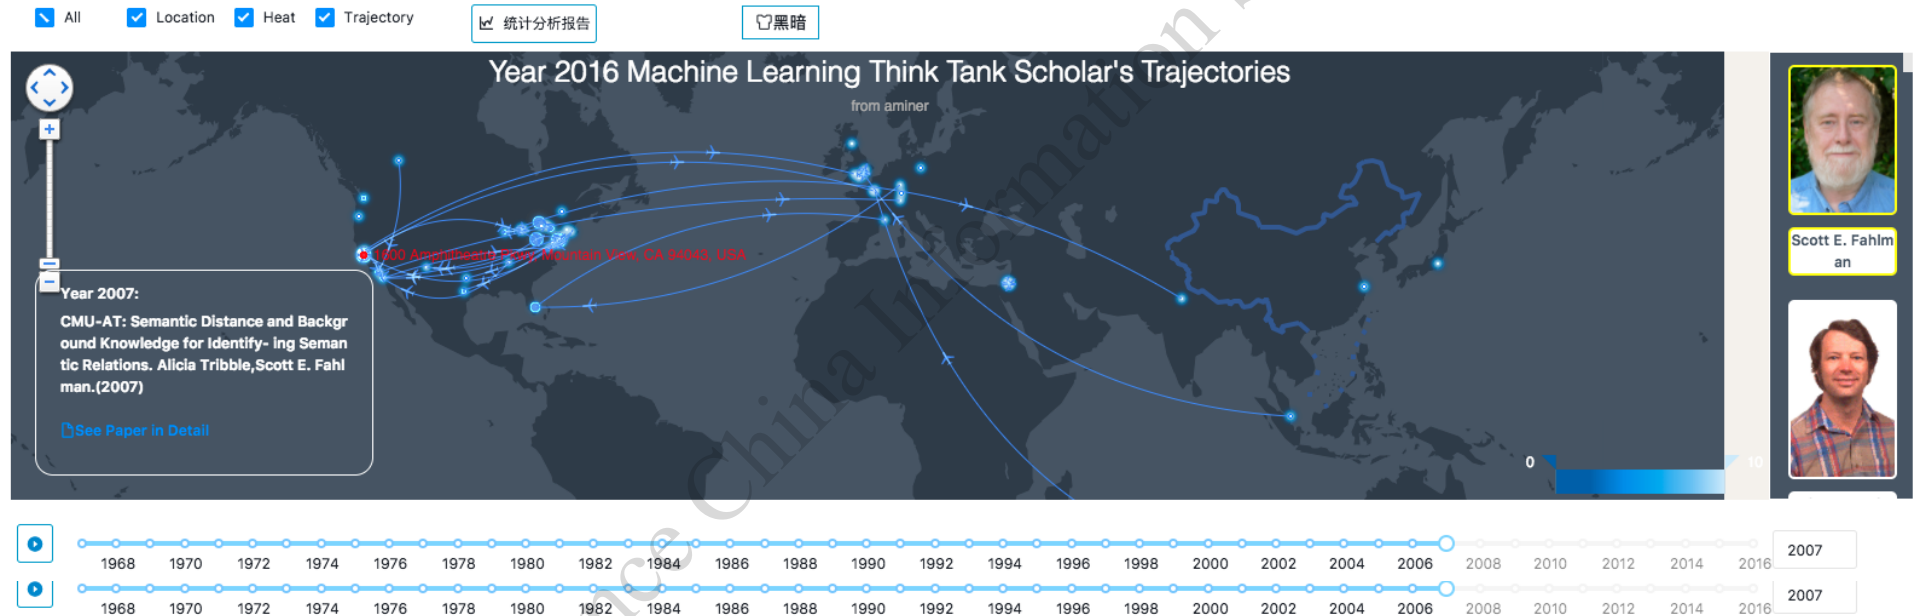

# Analytic Visualization

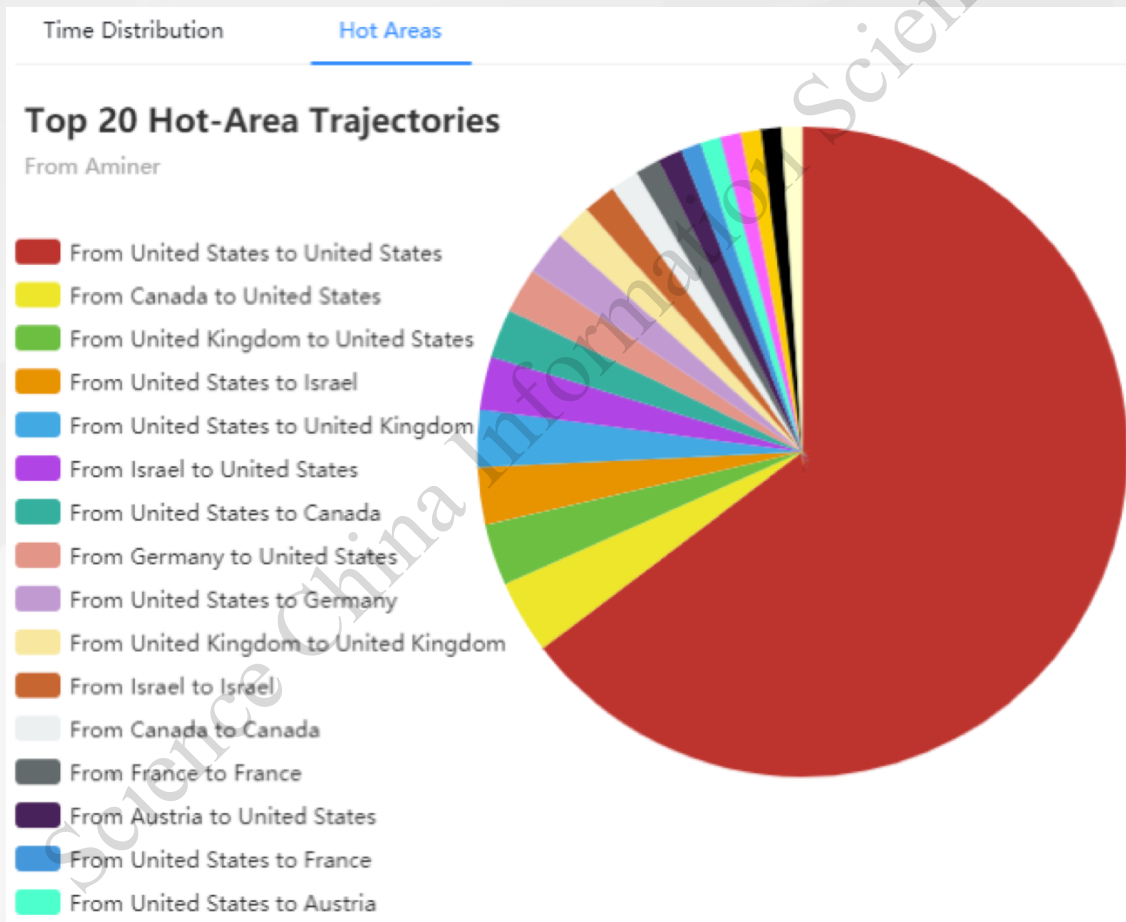

## Some Interesting Case Study (continued)

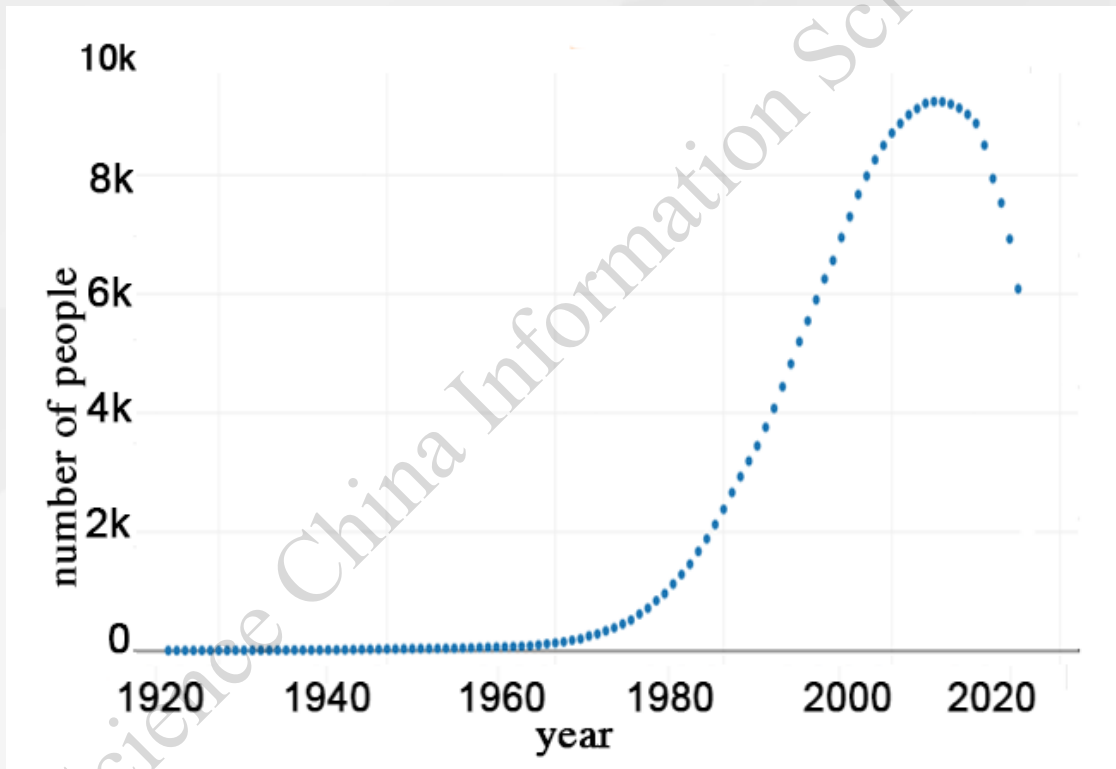

## Some Interesting Case Study (continued)

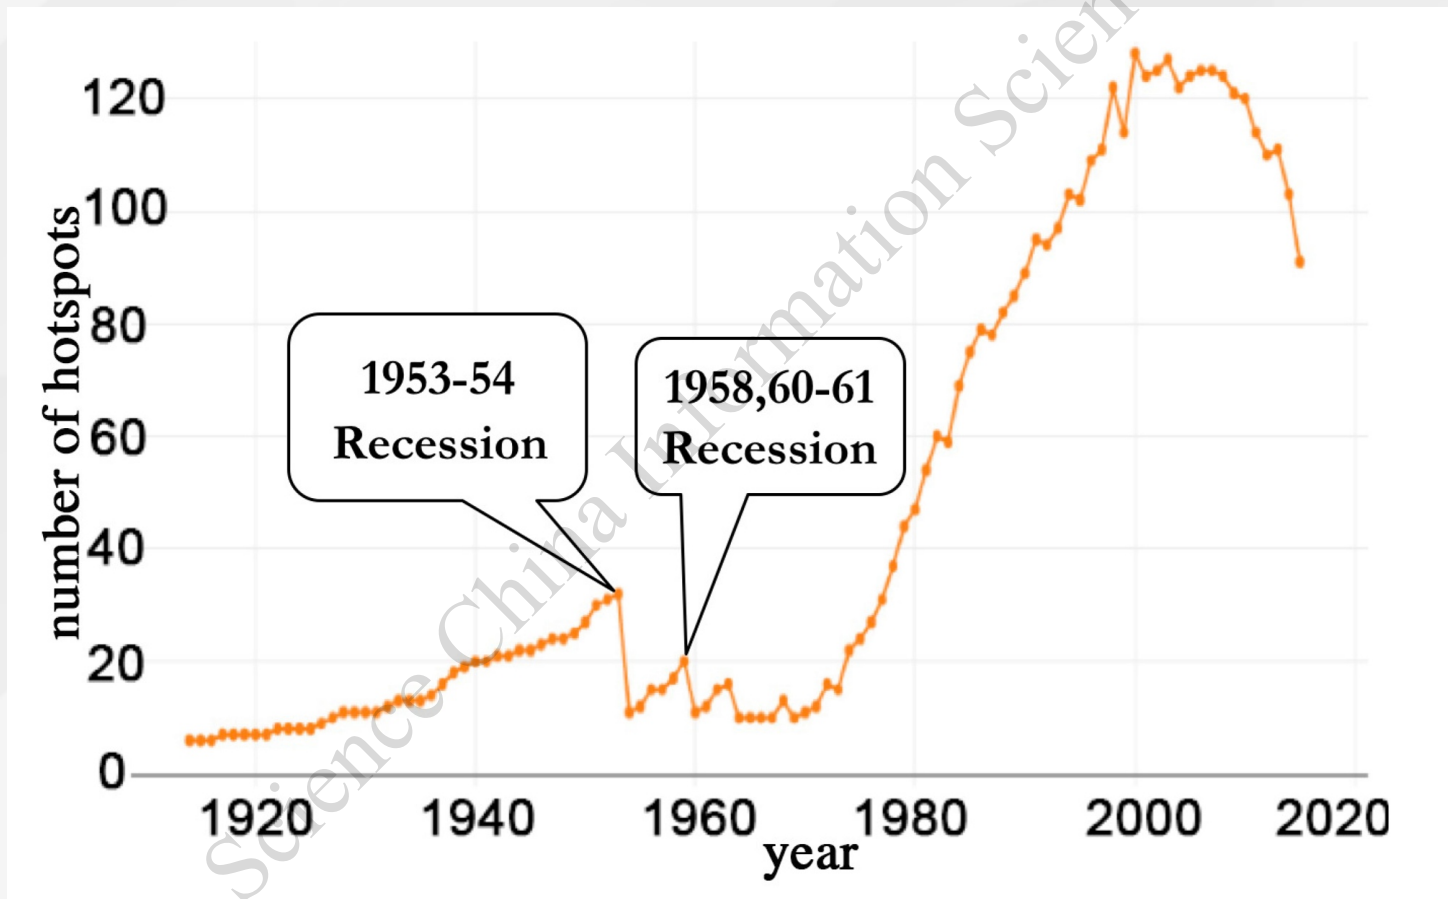

# Some Interesting Case Study

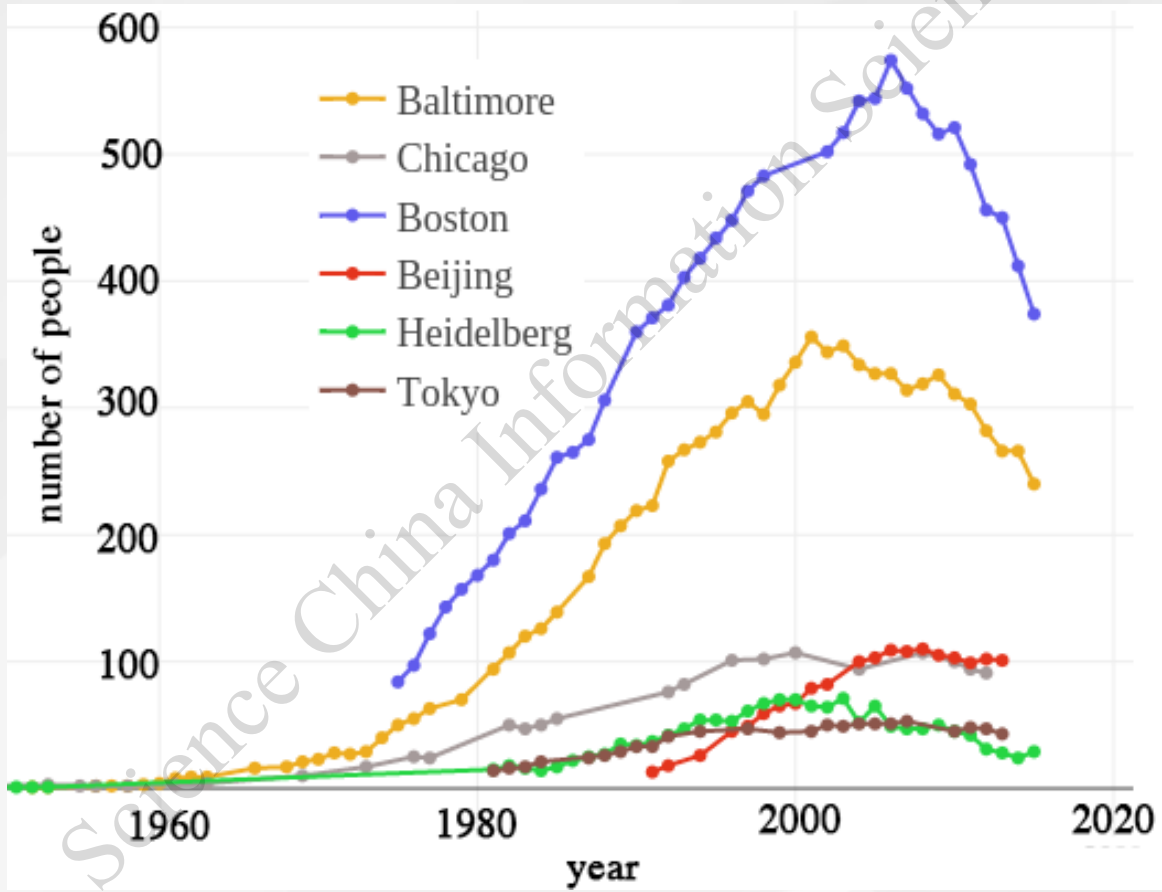

## Summary

Some interesting  
case studies

3

2

Architecture, technologies  
and main features of the  
system

1

We introduce the  
challenges of building  
CareerMap, a system for  
visualizing scholars'  
career trajectory

Science China Information Sciences

**Thanks**  
**Q&A**

Science China Information Sciences
